# Supplementary material
Source: PubMed Central journal article supplement (PMC8329998)

Figure S1. Appearance of cakes in 12-well plates after freeze-drying siRNA lipoplexes in solutions containing various concentrations of amino acids. siRNA lipoplexes with 50 pmol siRNA were diluted in 125  $\mu$ l 10, 25, 50, 100 or 150 mM amino acid solutions and then transferred to 12-well plates, followed by freeze-drying. siRNA, small interfering RNA; lipoplex, liposome complex.

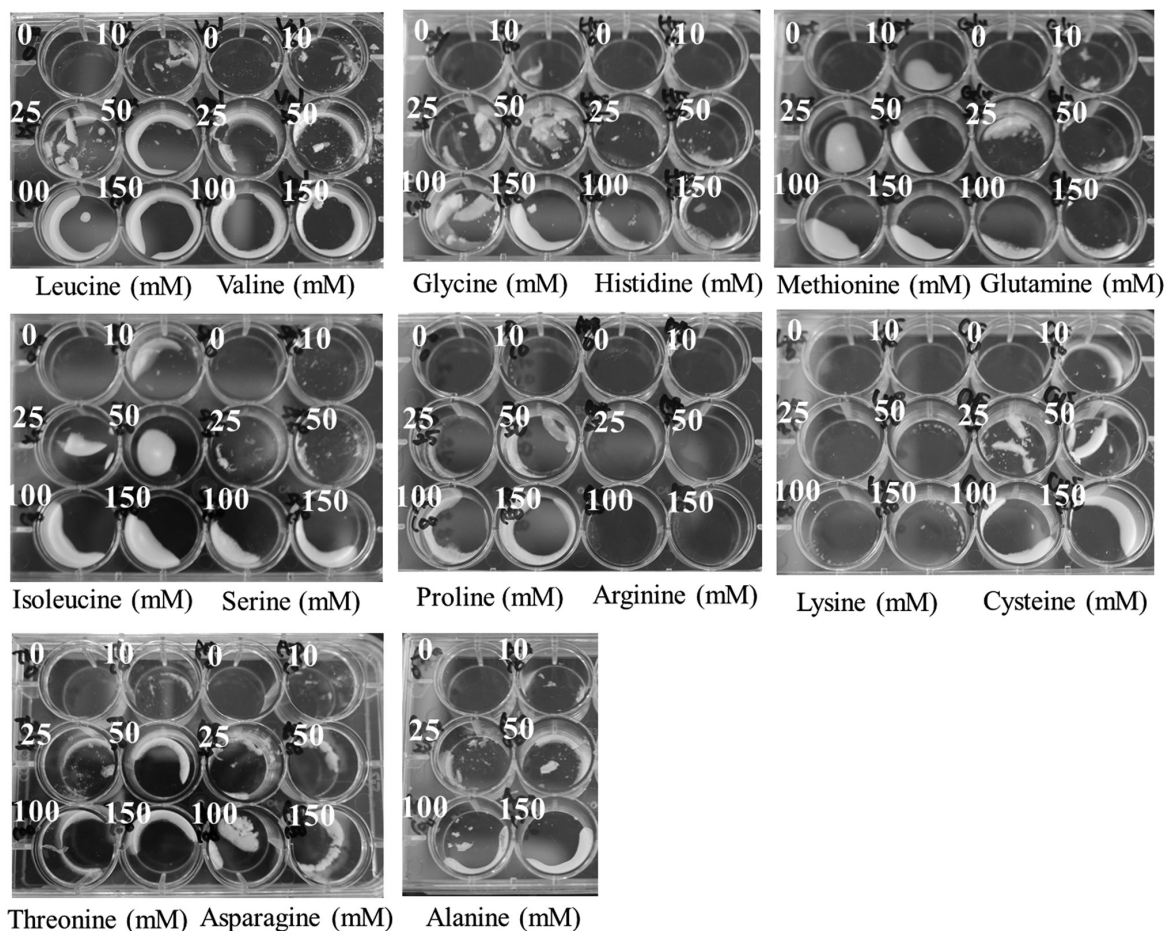

Supplement: Supplementary_Data.pdf [file Supplementary_Data.pdf]
